# Supplementary material for: Ceria-supported ruthenium catalysts for the synthesis of indole via dehydrogenative N-heterocyclization
Source: Royal Society of Chemistry journal article supplement (doi:10.1039/c1cy00235j), 2011-01-01
Supplement: c1cy00235j.pdf [file c1cy00235j.pdf]

## Supplementary Information

### **Ceria-Supported Ruthenium Catalysts for the Synthesis of Indole via Dehydrogenative**

#### ***N*-Heterocyclization**

Shun Shimura,<sup>[a]</sup> Hiroki Miura,<sup>[a]</sup> Kenji Wada,<sup>[a]\*</sup> Saburo Hosokawa,<sup>[a]</sup> Seiji Yamazoe,<sup>[b]</sup> and  
Masashi Inoue<sup>[a]\*</sup>

[a] Mr. Shun Shimura, Mr. Hiroki Miura, Dr. Kenji Wada,\* Dr. Saburo Hosokawa,<sup>[a]</sup> and Prof. Dr.  
Masashi Inoue\*

Department of Energy and Hydrocarbon Chemistry, Graduate School of Engineering,

Kyoto University, Katsura, Nishikyo-ku, Kyoto 615-8510 (Japan)

Fax: (+81)75-383-2479

E-mail: wadaken@scl.kyoto-u.ac.jp

[b] Dr. Seiji Yamazoe

Department of Materials Chemistry, Graduate School of Science and Technology

Ryukoku University, Seta, Otsu 520-2194 (Japan)

Fax: (+81)77-543-7483

E-mail: yamazoe@rins.ryukoku.ac.jp

## 1. Nitrogen gas adsorption analysis of the catalyst

BET surface areas of representative supported catalysts used in the present study are summarized in Table S1. The Ru/CeO<sub>2</sub>(KOH)-400 catalyst showed typical type IV nitrogen adsorption/desorption isotherms, which indicate that their pore sizes were within the mesopore region. The catalysts supported on CeO<sub>2</sub>-ZrO<sub>2</sub> mixed oxides had slightly smaller BET surface areas than those supported on pure ceria and zirconia.

**Table S1.** BET surface areas of the catalysts

| Entry | Catalyst                      | BET surface area (m <sup>2</sup> /g) | Entry | Catalyst                                      | BET surface area (m <sup>2</sup> /g) |
|-------|-------------------------------|--------------------------------------|-------|-----------------------------------------------|--------------------------------------|
| 1     | Ru/CeO <sub>2</sub> (KOH)-400 | 102                                  | 6     | Ru/SiO <sub>2</sub> -400                      | 269                                  |
| 2     | Ru/CeO <sub>2</sub> (KOH)-200 | 112                                  | 7     | Ru/Al <sub>2</sub> O <sub>3</sub> -400        | 142                                  |
| 3     | Ru/ZrO <sub>2</sub> -400      | 95                                   | 8     | Ru/CeO <sub>2</sub> -ZrO <sub>2</sub> (80/20) | 66                                   |
| 4     | Ru/MgO-400                    | 148                                  | 9     | Ru/CeO <sub>2</sub> -ZrO <sub>2</sub> (50/50) | 55                                   |
| 5     | Ru/TiO <sub>2</sub> -400      | 49                                   | 10    | Ru/CeO <sub>2</sub> -ZrO <sub>2</sub> (20/80) | 82                                   |

## 2. XRD patterns of the supported-Ru catalysts calcined at 400 °C

XRD patterns of Ru catalysts supported on various oxides are shown in Figure S1. The calcination temperature was 400 °C. Peaks due to crystalline RuO<sub>2</sub> were observed for Ru catalysts supported on SiO<sub>2</sub> and Al<sub>2</sub>O<sub>3</sub>. On the other hand, such peaks were not observed for catalysts supported on CeO<sub>2</sub>, ZrO<sub>2</sub>, TiO<sub>2</sub>, and MgO, which implied the formation of dispersed Ru species on the surface. The XRD patterns of CeO<sub>2</sub>-ZrO<sub>2</sub> mixed oxides are shown in Figure S2. Diffraction peaks due to the mixed oxides shifted toward lower angles with an increase in the Ce/Zr ratio, indicating the formation of solid solutions of ceria and zirconia.

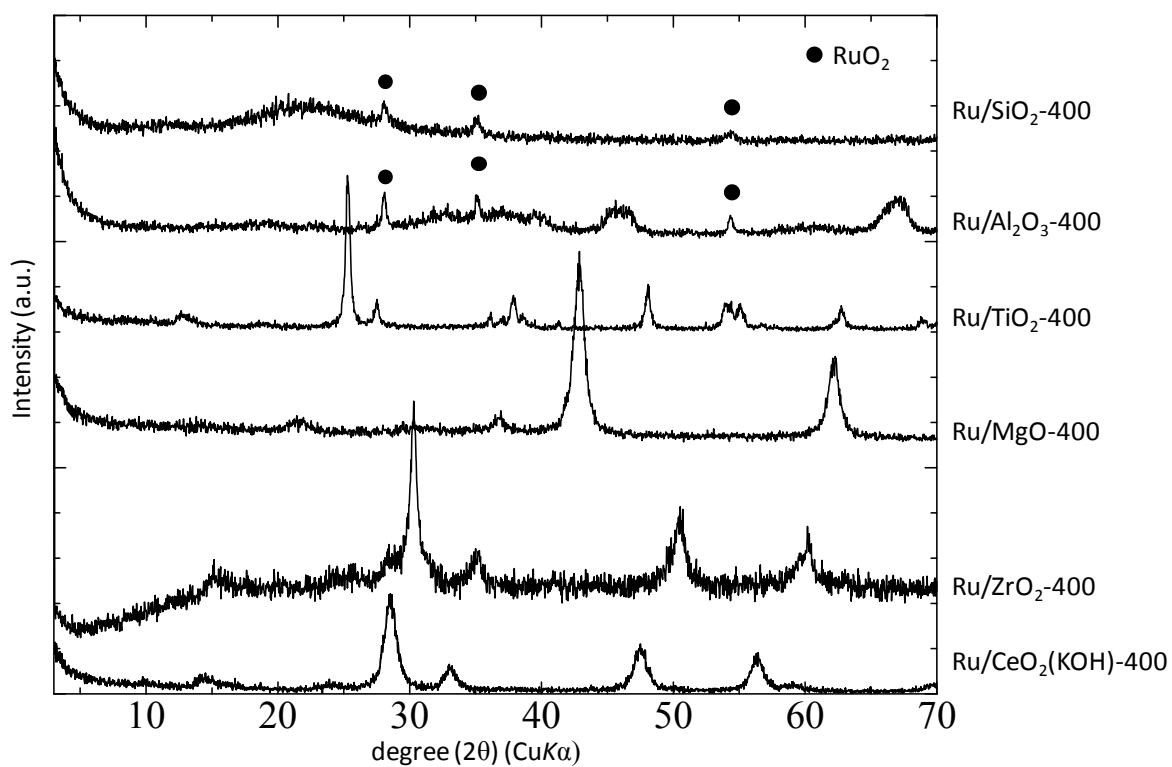

Figure S1. XRD patterns of the supported-Ru catalysts calcined at 400 °C.

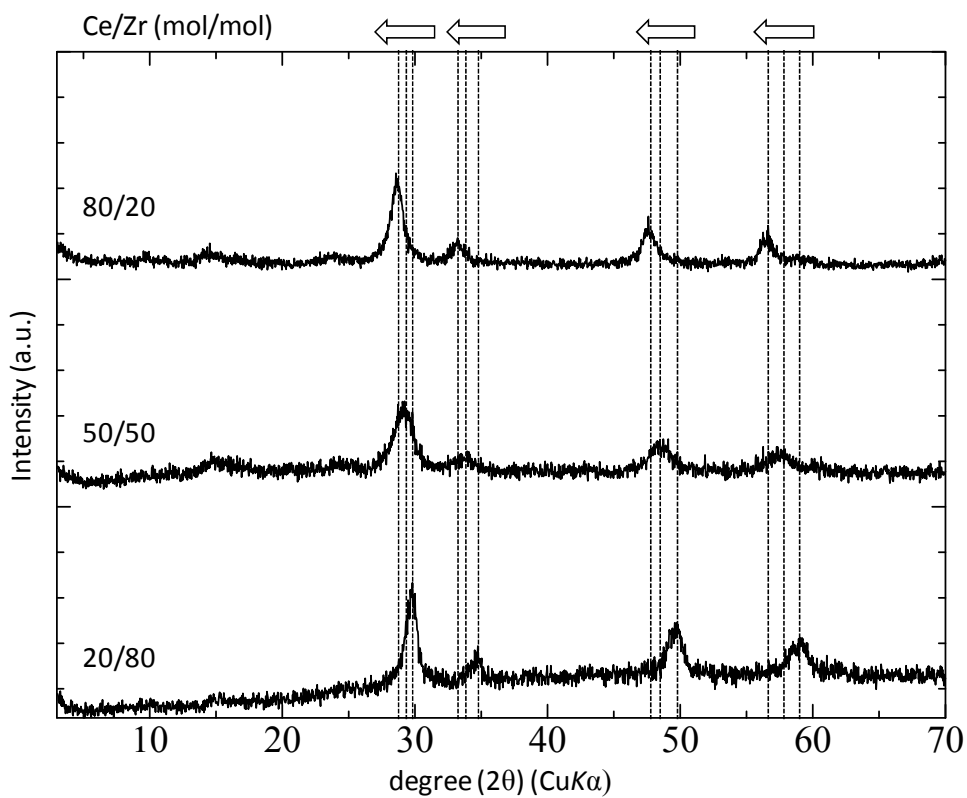

Figure S2. XRD patterns of ceria-zirconia mixed oxides

### 3. TG-DTA profiles of as-impregnated Ru/CeO<sub>2</sub>

Figure S3 shows TG-DTA profiles of as-impregnated Ru/CeO<sub>2</sub>(KOH) in air. There was an exothermic weight decrease at around 200 °C, and the extent of this decrease is almost consistent with the weight of acetylacetonato ligands in the catalyst (5.6%).

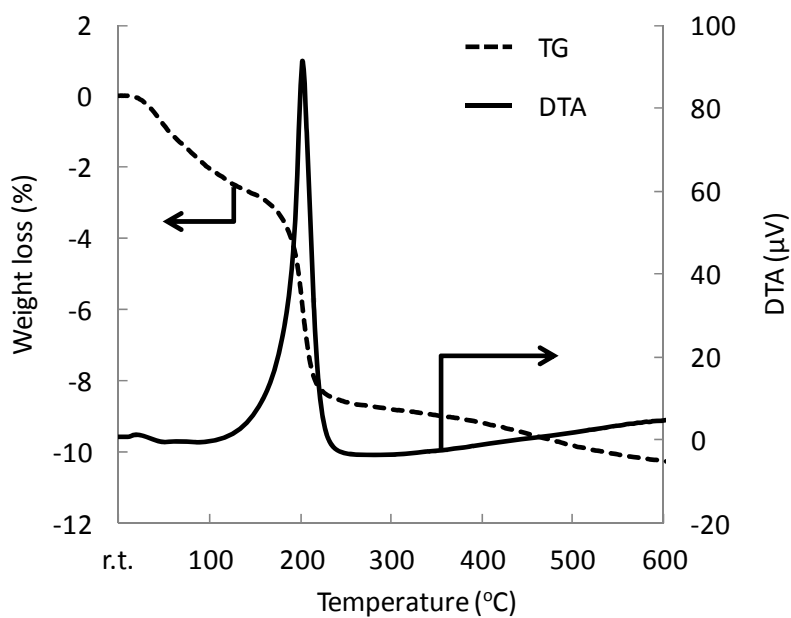

Figure S3. TG-DTA profile of Ru/CeO<sub>2</sub>(KOH)-as-imp.
